# Supplementary material for: The effect of metronomic versus standard chemotherapy on the regulatory to effector T-cell equilibrium in cancer patients
Source: PubMed Central journal article supplement (PMC3906764; doi:10.1186/2162-3619-3-3), 2014-01-23

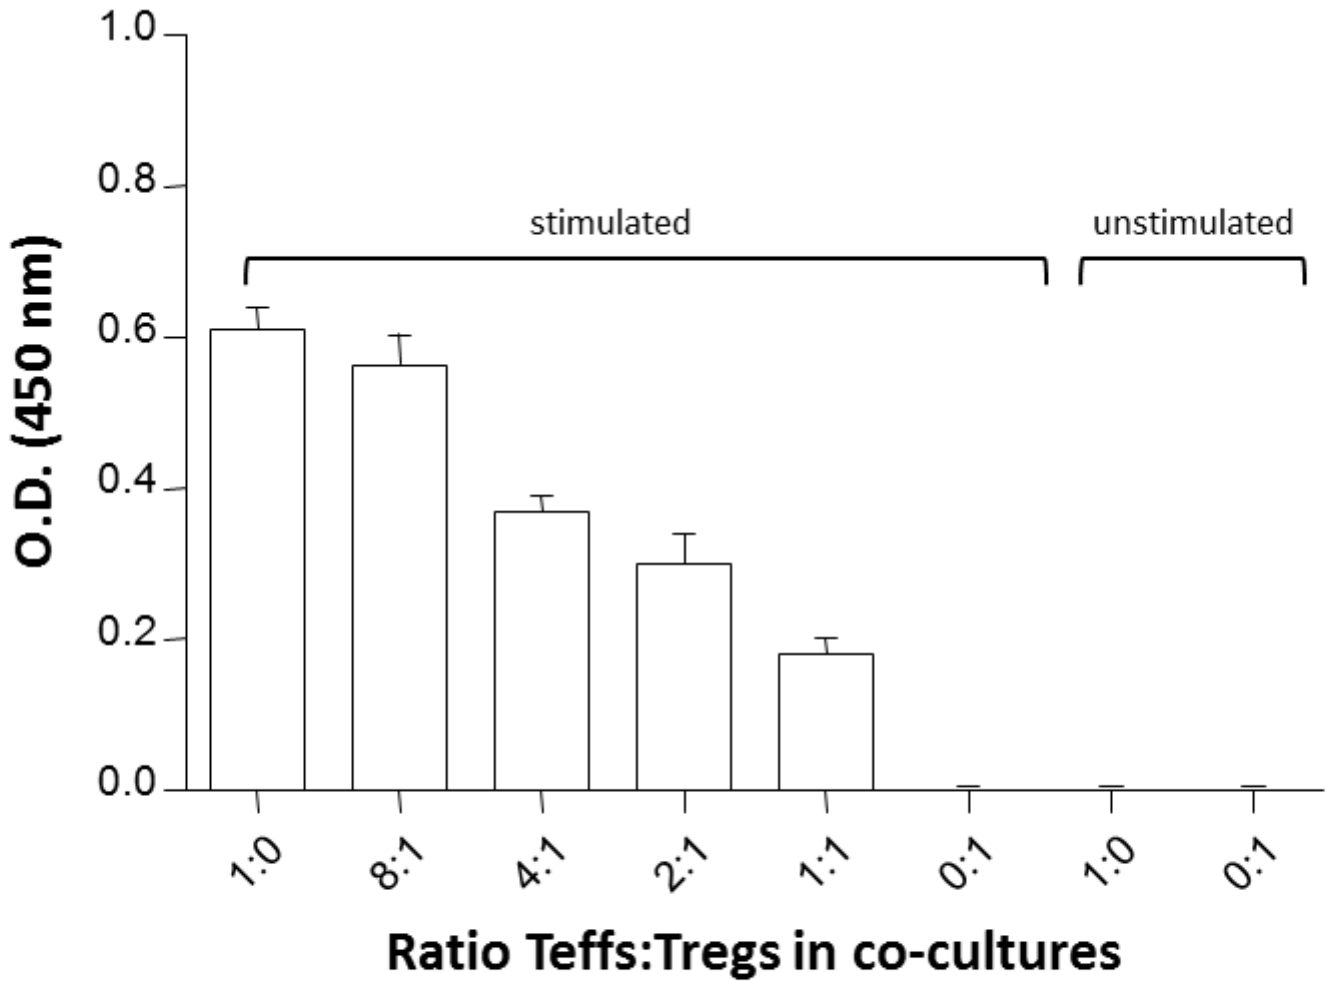

Supplement: 2162-3619-3-3-S1.pdf [file 2162-3619-3-3-S1.pdf]
